# Supplementary material for: Topographical regulation of stem cell differentiation by plant-derived micro/nanostructures
Source: Royal Society of Chemistry journal article supplement (doi:10.1039/d0nr02765k), 2020-01-01
Supplement: d0nr02765k1.pdf [file d0nr02765k1.pdf]

**Supporting information**

**Topographical regulation of stem cell differentiation by plant-  
derived micro/nanostructures**

**Ruitong Zhang,<sup>†a</sup> Shuwei Han,<sup>†a</sup> Na Ren,<sup>†a</sup> Linlin Liang,<sup>a</sup> Na Liang,<sup>a</sup> Fan Liu,<sup>a</sup> Yuke Chen,<sup>a</sup>  
Dong Li,<sup>\*b</sup> Wenxia Liu,<sup>c</sup> Hong Liu<sup>\*a,d</sup> and Chunhui Sun<sup>\*a</sup>**

<sup>a</sup> Collaborative Innovation Center of Technology and Equipment for Biological Diagnosis and Therapy in  
Universities of Shandong, Institute for Advanced Interdisciplinary Research (iAIR), University of Jinan, Jinan,  
250022, P. R. China

<sup>b</sup> Cryomedicine Laboratory, Qilu Hospital, Shandong University, Jinan, Shandong, 250012, P. R. China

<sup>c</sup> State Key Laboratory of Biobased Materials and Green Papermaking, Qilu University of Technology, Shandong  
Academy of Science, Jinan, Shandong 250353, P. R. China

<sup>d</sup> State Key Laboratory of Crystal Materials, Shandong University, 27 Shandan Road, Jinan, Shandong,  
250100, P. R. China

<sup>\*</sup> Corresponding authors at. Institute for Advanced Interdisciplinary Research (iAIR), University of Jinan, Jinan,  
250022, P. R. China.

E-mail addresses: [hongliu@sdu.edu.cn](mailto:hongliu@sdu.edu.cn) (H. Liu), [ifc\\_sunch@ujn.edu.cn](mailto:ifc_sunch@ujn.edu.cn) (C. Sun), [lidong73@sdu.edu.cn](mailto:lidong73@sdu.edu.cn) (D.  
Li)

<sup>†</sup> These authors contributed equally to this work.

1

## 2 **S1. Cytocompatibility Evaluation of Raffia**

3       The raffia was cut to the same size, and the samples were sterilized in 75% ethanol with UV  
4 overnight and washed three times with sterile PBS. Then 0.1 mL of cell suspension which  
5 contained  $2 \times 10^4$  cells was seeded on the surface of the samples in 24-well plates, and added 1 mL  
6 of complete medium. To investigate the attachment of the cell cultured on the surface of raffia,  
7 after 48 hours of culture, the cells were observed by immunofluorescence measurement of F-actin  
8 and their nuclei. Typically, hADSCs were fixed by 4% paraformaldehyde solution (SparkJade,  
9 Qingdao, China) for 10 min after washed. Then, the cells were permeated with 0.1% Triton X-100  
10 (Solarbio, Beijing, China) for 5 min and blocked with 10% bovine serum albumin (BSA)  
11 (Solarbio, Beijing, China) for 30 min. Rhodamine phalloidin (Cytoskeleton, Denver, USA) was  
12 used to stain F-actin at a 1:200 dilution for 30 min, and the cells were incubated with DAPI  
13 (Thermo Fisher Scientific, Waltham, MA, USA) to stain the nuclei for 5 min. Finally, the cells  
14 were washed three times by PBS, and then examined under the laser confocal microscope (LSM  
15 800, Zeiss, Germany).

16       Live/dead staining was used to obtain the survival of cells cultured on the surface of raffia.  
17 After 48 hours of culture in 24-well plates, the cultured medium was replaced with 200  $\mu$ L serum-  
18 free  $\alpha$ -MEM medium which counted 4  $\mu$ M propidium iodide (PI) and 2  $\mu$ M calcein AM (Thermo  
19 Fisher Scientific, Waltham, MA, USA), and then the cells were incubated at 37°C for 20 min.  
20 After washed three times with PBS, hADSCs were examined under the laser confocal microscope.

21       To further investigate the attachment of the cell cultured on the surface of raffia, after 48  
22 hours of culture in 24-well plates, the cells were washed three times by PBS, and 2.5%  
23 glutaraldehyde solution was used to fix the hADSCs overnight. Then a series of alcohol solutions  
24 (30%, 50%, 70%, 80%, 90%, 95%, 98%, and 100%) was used to dehydrate cells, and then  
25 hADSCs were lyophilized at -60°C for 6 hours. The cells were observed under the scanning  
26 electron microscope after 30 s Au spraying at a current of 10 mA.

27       To quantitatively measure cell viability and proliferation on the surface of raffia, the cultured  
28 medium was replaced with serum-free  $\alpha$ -MEM medium containing a 10% CCK-8 solution  
29 (MdeChemExpress, Shanghai, China) on the 1, 3, and 5 days, which was used to quantitatively  
30 assess cell viability. After 2 hours of incubation at 37°C, the culture medium containing a water-

1 soluble formazan dye having absorption at a wavelength of 450 nm was measured by a microplate  
2 reader (SYNERGY H1, BioTek, USA). Three replicates were used for each sample.

3

## 4 **S2. Osteogenic Differentiation of Evaluation of Raffia**

5 In this experiment, after cells cultured for 5 days, the culture medium was replaced with 5%  
6 fetal bovine serum  $\alpha$ -MEM medium containing 1% penicillin-streptomycin, 10 mM  $\beta$ -glycerol  
7 phosphate (Solarbio, Beijing, China), 100 nM dexamethasone (Solarbio, Beijing, China), and 50  
8  $\mu$ g/mL of L-ascorbic acid (Sinopharm, Shanghai, China). The cells cultured on all the substrates  
9 were characterized at the protein, gene, and functional levels to assess the osteogenesis of cells.

10

### 11 **S2.1. Alkaline phosphatase (ALP) Activity**

12 After 7, 14, and 21 days of culture in medium, cells cultured on different surface of raffia  
13 were lysed with 0.1% Triton X-100 for total intracellular protein content and ALP activity assays.  
14 The micro BCA protein assay kit (Solarbio, Beijing, China) was used to assay the total  
15 intracellular protein content by measuring the absorbance of the reaction solution at 570 nm. The  
16 ALP activity was analyzed using the laboratory-assay ALP activity assay kit (Wako Pure  
17 Chemical, Osaka, Japan) according to the manufacturer's instructions. The relative ALP activity  
18 was normalized with the protein content of cells cultured on different samples ( $n = 3$  for each  
19 group).

20

### 21 **S2.2 Quantitative PCR (q-PCR)**

22 After 7, 14, and 21 days of culture in medium, cells on different surface of raffia were treated  
23 with TRIZOL Reagent (Thermo Fisher Scientific, Waltham, MA, USA) to extract total RNA.  
24 RNA concentration and purity were measured using a Q-5000 spectrophotometer (Quwell) at  
25 260/280 nm. The real-time PCR system (LightCycler<sup>®</sup> 96, Roche, Switzerland) was used for q-  
26 PCR analysis of one housekeeping gene,  $\beta$ -actin, and three genes of Runx2, osteocalcin (OCN),  
27 and osteopontin (OPN) (Table S1 for primer sequence). The relative transcription levels of target  
28 gene expression were normalized to  $\beta$ -actin and expressed as the mean  $\pm$  S.D. ( $N = 3$  / group).

29

30 Table S1. Sequence of q-PCR primers

| Gene           | Forward primers (5'-3') | Reverse primers (5'-3')  |
|----------------|-------------------------|--------------------------|
| $\beta$ -actin | CATGTACGTTGCTATCCAGGC   | CTCCTTAATGTCACGCACGAT    |
| OPN            | TCCTGTCTCCCGGTGAAAGT    | GGCTACAGCATCTGAGTGTTCG   |
| OCN            | AAGCCCAGCGACTCTGAGTCT   | CCGGAGTCTATTCACCACCTTACT |
| Runx2          | AATGCCTCCGCTGTTATG      | TTCTGTCTGTGCCTTCTTG      |

1

## 2 S2.3 Alizarin Red S (ARS) Staining

3 After a culture period of 21 days, the cells cultured on the different surface of raffia and  
4 TCPs were fixed with 4% paraformaldehyde for 30 min, and then the samples were stained with  
5 2% ARS (Solarbio, Beijing, China) at pH 4.2 for 10 min. After washing the cells with distilled  
6 water for three times, the ARS stained samples were observed under a polarizing microscope with  
7 camera (CX31-P-OC-1, Olympus, Japan).

8

## 9 S2.4 Immunofluorescence Staining

10 After 21 days, cells cultured on the samples were washed with PBS three times and fixed  
11 with 4% paraformaldehyde at room temperature for 10 min. Then the cells were permeabilized by  
12 using 0.1% Triton X-100 for 10 min and blocked with 10% bovine serum albumin solution for 1 h  
13 at room temperature. After blocking, the cells were incubated with primary antibodies at 1:1000  
14 dilution against osteocalcin (mouse monoclonal anti-OCN, Abcam) and osteopontin (rabbit  
15 polyclonal anti-OPN, Abcam) at 4°C for overnight. Goat anti-rabbit and goat anti-mouse  
16 secondary antibodies labeled by Alexa Fluor 488 (Thermo Fisher Scientific, Waltham, MA, USA)  
17 and Alexa Fluor 594 (Thermo Fisher Scientific, Waltham, MA, USA) at 1:200 dilutions in 1%  
18 bovine serum albumin solution were respectively used for staining OPN and OCN for 1 h at room  
19 temperature. After rinsing off the second antibody with PBS, the OPN was further stained F-actin  
20 by rhodamine phalloidin for 1 h and the OPN and OCN were stained nuclei by DAPI for 10 min .  
21 Images of the stained samples were obtained using the laser confocal microscope.

22

## 23 S2.5 Statistical Analysis

24 Statistics were performed using one-way analysis of variance (ANOVA) in PASW Statistics  
25 18. The data were expressed as mean  $\pm$  S.D. (standard deviation). The statistical significance of  
26 the differences was determined by a one-way ANOVA (\* means  $p < 0.05$ , \*\* means  $p < 0.01$ , and

1 #  $p > 0.05$ , represents no significance).

2

### 3 S3. Raffia Characterization

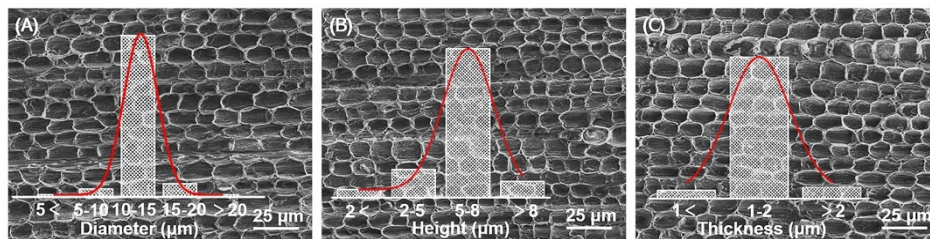

4

5 **Fig. S1** The statistical analysis of the (A) diameter, (B) height, and (C) thickness of the  
6 structures.

7

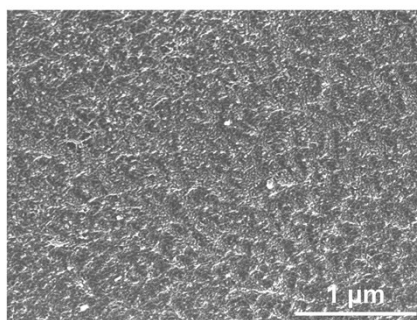

8

9 **Fig. S2** SEM image at high magnification of the front surfaces of raffia.

10

11

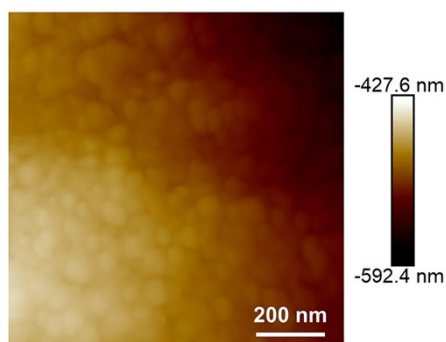

12

13 **Fig. S3** The AFM morphology image of the front surface of raffia at the higher magnification  
14 after OP treatment.

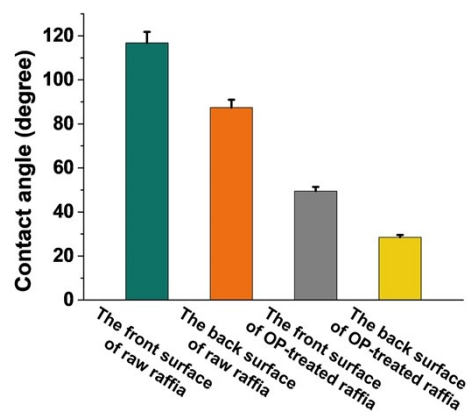

**Fig. S4** The statistical analysis about the contact angles of the samples.

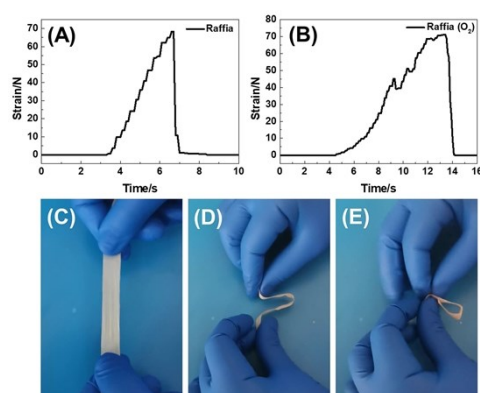

**Fig. S5** The mechanical properties experiments about the (A-B) tensile test, (C-E) flexibility test of raffia.
